# Supplementary material for: DIVA Meets EEG: Model Validation Using Formant-Shift Reflex
Source: PubMed Central journal article supplement (PMC10906992; doi:10.3390/app13137512), 2023-06-25
Supplement: NIHMS1959001-supplement-SM.pdf [file NIHMS1959001-supplement-SM.pdf]

## Supplementary Materials

| <b>Table of content</b>                                                                                                         | <b>page</b> |
|---------------------------------------------------------------------------------------------------------------------------------|-------------|
| Table S1: Cortical regions selected as seeds in DIVA_EEG.                                                                       | 2           |
| Figure S1: Synthetic EEG (DIVA_EEG) traces, and electrode layout                                                                | 4           |
| Table S2: Numbers of active voxels in AAL90 areas in DIVA model simulations.                                                    | 5           |
| Table S3: Numbers of active voxels in AAL90 areas reflecting the by cortical activity in auditory feedback reflexive paradigms. | 7           |
| Table S4: Numbers of active voxels in AAL90 areas by cortical activity when comparing DIVA_EEG model and real EEG.              | 8           |
| Figure S2: Example of compensations in the same direction of the down- shift F1.                                                | 8           |
| Table S5: Cohen Effect Size of the cortical activations.                                                                        | 9           |

**Table S1.** Cortical regions selected as seeds in DIVA\_EEG.

| Model component                     | MNI_Right |     |    |        |     |     | MNI_Left |     |    |        |     |    |
|-------------------------------------|-----------|-----|----|--------|-----|-----|----------|-----|----|--------|-----|----|
|                                     | DIVA      |     |    | LORETA |     |     | DIVA     |     |    | LORETA |     |    |
|                                     | X         | Y   | Z  | X      | Y   | Z   | X        | Y   | Z  | X      | Y   | Z  |
| Motivation map                      | 6         | 15  | 37 | 13     | 13  | 58  | -8       | 13  | 36 | -12    | 9   | 62 |
| Initiation map                      | 4         | 2   | 60 | 6      | 1   | 59  | -3       | -1  | 59 | -8     | -4  | 63 |
| Speech sound map                    |           |     |    |        |     |     | -57      | -1  | 40 | -56    | -2  | 41 |
| Speech sound map                    |           |     |    |        |     |     | -55      | 9   | 0  | -41    | 5   | 0  |
| Speech sound map                    |           |     |    |        |     |     | -37      | 19  | 8  | -46    | 10  | 8  |
| Speech sound map                    | 39        | 12  | 0  | 41     | 6   | 0   | -34      | 13  | 4  | -36    | 3   | 3  |
| Feedback control map—auditory       | 46        | 23  | 6  | 45     | 13  | 6   |          |     |    |        |     |    |
| Feedback control map—somatosensory  | 41        | 18  | -2 | 39     | 18  | -10 |          |     |    |        |     |    |
| Feedback control map—somatosensory  | 53        | 23  | 6  | 50     | 14  | 6   |          |     |    |        |     |    |
| Feedback control map—somatosensory  | 50        | 8   | 13 | 52     | 7   | 6   |          |     |    |        |     |    |
| Articulator map—jaw                 | 49        | -10 | 33 | 53     | -10 | 30  | -51      | -9  | 33 | -51    | -9  | 39 |
| Articulator map—jaw                 | 59        | -3  | 9  | 62     | -2  | 12  | -59      | -4  | 17 | -56    | -5  | 19 |
| Articulator map—larynx              | 53        | -3  | 50 | 55     | -2  | 56  | -48      | -12 | 38 | -47    | -14 | 38 |
| Articulator map—larynx              | 63        | 0   | 21 | 62     | 0   | 16  | -58      | -4  | 23 | -61    | -5  | 23 |
| Articulator map—lip                 | 58        | -2  | 41 | 61     | -2  | 45  | -40      | -17 | 38 | -43    | -16 | 39 |
| Articulator map—lip                 | 63        | 2   | 14 | 62     | 2   | 13  | -62      | 4   | 23 | -62    | 1   | 22 |
| Articulator map—respiratory         | 21        | -28 | 55 | 27     | -28 | 56  | -21      | -28 | 55 | -28    | -30 | 59 |
| Articulator map—respiratory         | 43        | -13 | 38 | 46     | -14 | 40  | -50      | -1  | 50 | -50    | -4  | 50 |
| Articulator map—tongue              | 58        | -3  | 29 | 59     | -1  | 32  | -56      | -5  | 31 | -56    | -7  | 25 |
| Articulator map—tongue              | 60        | 2   | 6  | 63     | 3   | 17  | -61      | 2   | 13 | -55    | 2   | 12 |
| Somatosensory state map—jaw         | 50        | -15 | 43 | 51     | -17 | 38  | -51      | -11 | 29 | -53    | -15 | 28 |
| Somatosensory state map—jaw         | 53        | -13 | 12 | 53     | -16 | 11  | -53      | -12 | 11 | -51    | -14 | 11 |
| Somatosensory state map—larynx      | 49        | -15 | 39 | 49     | -20 | 40  | -47      | -17 | 35 | -47    | -18 | 36 |
| Somatosensory state map—larynx      | 67        | -11 | 12 | 61     | -10 | 13  | -66      | -11 | 35 | -62    | -10 | 34 |
| Somatosensory state map—lip         | 52        | -10 | 28 | 51     | -14 | 26  | -62      | -16 | 34 | -62    | -14 | 33 |
| Somatosensory state map—lip         | 66        | -16 | 18 | 58     | -15 | 22  | -65      | -12 | 28 | -62    | -11 | 27 |
| Somatosensory state map—respiratory | 19        | -30 | 56 | 25     | -30 | 61  | -22      | -30 | 56 | -26    | -32 | 61 |
| Somatosensory state map—tongue      | 61        | -6  | 25 | 62     | -6  | 23  | -59      | -9  | 21 | -59    | -10 | 19 |
| Somatosensory target map            | 66        | -16 | 24 | 61     | -12 | 24  | -65      | -16 | 21 | -57    | -15 | 22 |
| Somatosensory target map            | 60        | -35 | 20 | 49     | -32 | 20  | -59      | -19 | 30 | -59    | -22 | 30 |
| Somatosensory error map             | 66        | -16 | 24 | 59     | -15 | 27  | -65      | -16 | 21 | -59    | -15 | 17 |
| Somatosensory error map             | 57        | -22 | 34 | 57     | -22 | 38  | -54      | -25 | 33 | -53    | -25 | 33 |
| Somatosensory error map             | 58        | -31 | 34 | 56     | -31 | 39  |          |     |    |        |     |    |
| Somatosensory error map             | 64        | -41 | 28 | 55     | -30 | 27  |          |     |    |        |     |    |
| Somatosensory error map             | 60        | -35 | 20 | 52     | -30 | 23  | -60      | -36 | 31 | -57    | -27 | 31 |
| Somatosensory error map             | 60        | -25 | 25 | 56     | -25 | 27  | -61      | -24 | 23 | -53    | -24 | 22 |
| Somatosensory error map             | 41        | -10 | -7 | 41     | -8  | -6  | -39      | -9  | -8 | -39    | -9  | -7 |
| Somatosensory error map             | 40        | -7  | 9  | 40     | -14 | 18  | -43      | -11 | 2  | -42    | -12 | 14 |

|                     |    |     |    |    |     |    |     |     |    |     |     |    |
|---------------------|----|-----|----|----|-----|----|-----|-----|----|-----|-----|----|
| Auditory state map  | 64 | -22 | -4 | 43 | -22 | -5 | -65 | -22 | -2 | -51 | -18 | -3 |
| Auditory state map  | 58 | -34 | 1  | 42 | -34 | 7  | -68 | -30 | 7  | -53 | -27 | 11 |
| Auditory state map  | 52 | -28 | 10 | 52 | -21 | 12 | -51 | -37 | 15 | -47 | -37 | 20 |
| Auditory state map  | 65 | -15 | 6  | 59 | -14 | 13 | -61 | -12 | 5  | -58 | -13 | 12 |
| Auditory state map  | 62 | 2   | -3 | 57 | 1   | -6 | -55 | 1   | -3 | -57 | 3   | -3 |
| Auditory state map  | 49 | -33 | -5 | 38 | -30 | -2 | -57 | -42 | 4  | -34 | -41 | 3  |
| Auditory state map  | 40 | -23 | 3  | 42 | -26 | 10 | -45 | -30 | 6  | -48 | -29 | 12 |
| Auditory state map  | 61 | -28 | 10 | 56 | -18 | 11 | -37 | -25 | 3  | -35 | -24 | 9  |
| Auditory target map | 69 | -30 | 2  | 56 | -13 | 2  | -68 | -31 | 7  | -53 | -27 | 11 |
| Auditory target map | 60 | -39 | 6  | 42 | -34 | 7  | -66 | -38 | 15 | -53 | -28 | 15 |
| Auditory target map | 56 | -21 | -5 | 54 | -5  | -4 | -56 | -26 | 6  | -53 | -27 | 11 |
| Auditory target map | 54 | -30 | 12 | 42 | -30 | 11 | -46 | -39 | 19 | -42 | -40 | 19 |
| Auditory error map  | 69 | -30 | 2  | 56 | -13 | 2  | -66 | -38 | 15 | -53 | -28 | 15 |
| Auditory error map  | 60 | -39 | 6  | 42 | -34 | 7  | -56 | -26 | 6  | -53 | -27 | 11 |
| Auditory error map  | 56 | -21 | -5 | 54 | -5  | -4 | -46 | -39 | 19 | -42 | -40 | 19 |
| Auditory error map  | 54 | -30 | 12 | 42 | -30 | 11 | -68 | -31 | 7  | -53 | -27 | 11 |

### A DIVA\_EEG signals in undisturbed conditions

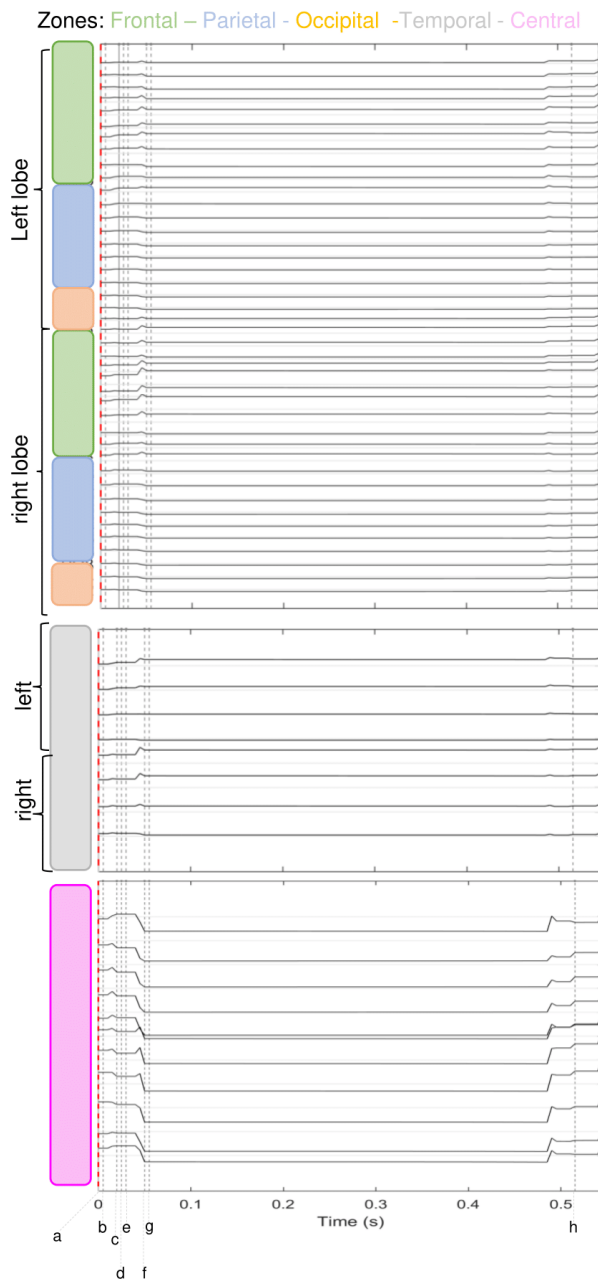

### B Scalp Electrodes view cortex (Biosemi 64)

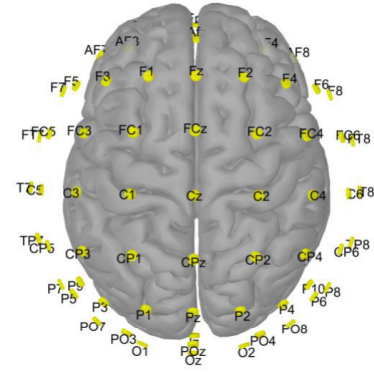

### C DIVA\_EEG signals for temporal lobe in disturbed conditions

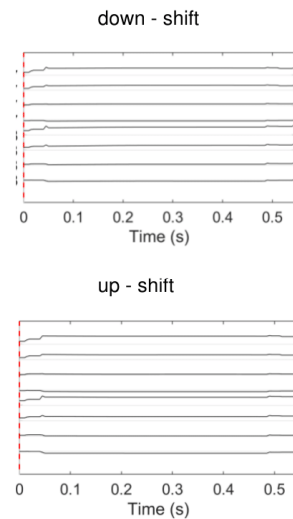

**Figure S1.** Synthetic EEG (DIVA\_EEG) traces, montage, and map activations. (A). DIVA\_EEG for each of the brain areas, each of the letters (in the dotted vertical lines) represents the time of activation/deactivation of the following maps: (a, time=0s) initiation, motivation, speech, somato\_t, auditory\_t, (b, time=0.005s) articulator, (c, time=0.02s) somato\_s, (d, time=0.025s) somato\_e, (e, time=0.03s) feedback, (f, time=0.05s) auditory\_s, (g, time=0.055s) auditory\_t, (h, time=0.51s) somato\_e, somato\_t, (i, time=0.05s) initiation, speech, auditory\_t, arti, auditory\_s, somato\_s, feedback. (B). electrode montage using in this study. (C) Synthetic EEG (DIVA\_EEG) traces temporal lobe by down-shift and up-shift.

**Table S2.** Numbers of active voxels in AAL90 areas in DIVA model simulations.

| Down-Undisturbed     |         | Up-Undisturbed       |         | Down-Up            |         |
|----------------------|---------|----------------------|---------|--------------------|---------|
| Area                 | # voxel | Area                 | # voxel | Area               | # voxel |
| Precentral_R         | 36      | Precentral_R         | 32      | Precentral_R       | 37      |
| Frontal_Sup_R        | 18      | Frontal_Sup_R        | 12      | Frontal_Sup_R      | 1       |
| Frontal_Sup_Orb_R    | 4       | Frontal_Sup_Orb_R    | 7       | Frontal_Mid_R      | 10      |
| Frontal_Mid_R        | 7       | Frontal_Mid_R        | 6       | Frontal_Inf_Oper_R | 19      |
| Frontal_Mid_Orb_R    | 4       | Frontal_Mid_Orb_R    | 4       | Frontal_Inf_Tri_R  | 6       |
| Frontal_Inf_Oper_R   | 13      | Frontal_Inf_Oper_R   | 11      | Insula_R           | 11      |
| Frontal_Inf_Tri_R    | 1       | Frontal_Inf_Tri_R    | 1       | Postcentral_R      | 27      |
| Frontal_Inf_Orb_R    | 34      | Rolandic_Oper_R      | 24      | Parietal_Inf_R     | 2       |
| Rolandic_Oper_R      | 24      | Frontal_Inf_Orb_R    | 35      | SupraMarginal_R    | 5       |
| Supp_Motor_Area_R    | 16      | Supp_Motor_Area_R    | 10      | Precentral_L       | 23      |
| Frontal_Med_Orb_R    | 2       | Olfactory_R          | 2       | Frontal_Mid_L      | 3       |
| Rectus_R             | 11      | Frontal_Med_Orb_R    | 2       | Parietal_Inf_L     | 7       |
| Insula_R             | 53      | Rectus_R             | 19      | Postcentral_L      | 20      |
| Cingulum_Ant_R       | 1       | Insula_R             | 52      | SupraMarginal_L    | 3       |
| Cingulum_Mid_R       | 6       | Cingulum_Ant_R       | 2       |                    |         |
| Cingulum_Post_R      | 5       | Cingulum_Mid_R       | 3       |                    |         |
| Hippocampus_R        | 8       | Cingulum_Post_R      | 4       |                    |         |
| ParaHippocampal_R    | 6       | Hippocampus_R        | 10      |                    |         |
| Amygdala_R           | 1       | ParaHippocampal_R    | 19      |                    |         |
| Cuneus_R             | 1       | Amygdala_R           | 2       |                    |         |
| Occipital_Sup_R      | 2       | Cuneus_R             | 1       |                    |         |
| Fusiform_R           | 2       | Lingual_R            | 3       |                    |         |
| Postcentral_R        | 78      | Occipital_Sup_R      | 3       |                    |         |
| Parietal_Sup_R       | 16      | Fusiform_R           | 7       |                    |         |
| Parietal_Inf_R       | 20      | Postcentral_R        | 76      |                    |         |
| SupraMarginal_R      | 26      | Parietal_Sup_R       | 17      |                    |         |
| Angular_R            | 3       | Parietal_Inf_R       | 19      |                    |         |
| Precuneus_R          | 27      | SupraMarginal_R      | 25      |                    |         |
| Paracentral_Lobule_R | 2       | Angular_R            | 3       |                    |         |
| Heschl_R             | 10      | Precuneus_R          | 31      |                    |         |
| Temporal_Sup_R       | 31      | Paracentral_Lobule_R | 1       |                    |         |
| Temporal_Pole_Sup_R  | 29      | Heschl_R             | 10      |                    |         |
| Temporal_Mid_R       | 1       | Temporal_Sup_R       | 31      |                    |         |
| Temporal_Pole_Mid_R  | 14      | Temporal_Pole_Sup_R  | 30      |                    |         |
| Temporal_Inf_R       | 3       | Temporal_Mid_R       | 2       |                    |         |
| Precentral_L         | 27      | Temporal_Pole_Mid_R  | 18      |                    |         |
| Frontal_Sup_Orb_L    | 13      | Temporal_Inf_R       | 3       |                    |         |
| Frontal_Mid_L        | 3       | Precentral_L         | 26      |                    |         |
| Frontal_Mid_Orb_L    | 5       | Frontal_Sup_Orb_L    | 17      |                    |         |
| Frontal_Inf_Oper_L   | 12      | Frontal_Mid_L        | 20      |                    |         |
| Frontal_Inf_Tri_L    | 1       | Frontal_Mid_Orb_L    | 5       |                    |         |
| Frontal_Inf_Orb_L    | 28      | Frontal_Inf_Oper_L   | 12      |                    |         |

---

|                     |    |                     |    |
|---------------------|----|---------------------|----|
| Rolandic_Oper_L     | 18 | Frontal_Inf_Tri_L   | 1  |
| Frontal_Med_Orb_L   | 1  | Frontal_Inf_Orb_L   | 29 |
| Rectus_L            | 5  | Rolandic_Oper_L     | 19 |
| Insula_L            | 35 | Olfactory_L         | 3  |
| Cingulum_Ant_L      | 1  | Frontal_Med_Orb_L   | 2  |
| Hippocampus_L       | 7  | Rectus_L            | 9  |
| ParaHippocampal_L   | 7  | Insula_L            | 35 |
| Lingual_L           | 2  | Cingulum_Ant_L      | 1  |
| Fusiform_L          | 9  | Cingulum_Mid_L      | 19 |
| Postcentral_L       | 44 | Cingulum_Post_L     | 6  |
| Parietal_Sup_L      | 10 | Hippocampus_L       | 13 |
| Parietal_Inf_L      | 42 | ParaHippocampal_L   | 15 |
| SupraMarginal_L     | 14 | Calcarine_L         | 2  |
| Angular_L           | 4  | Cuneus_L            | 2  |
| Heschl_L            | 7  | Lingual_L           | 9  |
| Temporal_Sup_L      | 33 | Occipital_Sup_L     | 1  |
| Temporal_Pole_Sup_L | 19 | Occipital_Mid_L     | 2  |
| Temporal_Mid_L      | 8  | Fusiform_L          | 17 |
| Temporal_Pole_Mid_L | 20 | Postcentral_L       | 56 |
|                     |    | Parietal_Sup_L      | 31 |
|                     |    | Parietal_Inf_L      | 38 |
|                     |    | SupraMarginal_L     | 13 |
|                     |    | Angular_L           | 5  |
|                     |    | Precuneus_L         | 40 |
|                     |    | Heschl_L            | 7  |
|                     |    | Temporal_Sup_L      | 33 |
|                     |    | Temporal_Pole_Sup_L | 20 |
|                     |    | Temporal_Mid_L      | 8  |
|                     |    | Temporal_Pole_Mid_L | 24 |
|                     |    | Temporal_Inf_L      | 4  |

---

L: left, R: right.

**Table S3.** Numbers of active voxels in AAL90 areas reflecting the by cortical activity in auditory feedback reflexive paradigms.

| Down-Undisturbed    |         | Up-Undisturbed       |         |
|---------------------|---------|----------------------|---------|
| Area                | # voxel | Area                 | # voxel |
| Precentral_R        | 46      | Supp_Motor_Area_R    | 8       |
| Frontal_Mid_R       | 5       | Insula_R             | 1       |
| Frontal_Inf_Oper_R  | 12      | Cingulum_Mid_R       | 52      |
| Rolandic_Oper_R     | 39      | Cingulum_Post_R      | 2       |
| Supp_Motor_Area_R   | 1       | ParaHippocampal_R    | 1       |
| Insula_R            | 36      | Cuneus_R             | 13      |
| Cingulum_Mid_R      | 2       | Lingual_R            | 22      |
| Calcarine_R         | 13      | Occipital_Sup_R      | 7       |
| Cuneus_R            | 11      | Fusiform_R           | 14      |
| Lingual_R           | 14      | Precuneus_R          | 1       |
| Postcentral_R       | 30      | Paracentral_Lobule_R | 10      |
| Parietal_Sup_R      | 1       | Heschl_R             | 2       |
| SupraMarginal_R     | 5       | Precentral_L         | 7       |
| Precuneus_R         | 2       | Frontal_Sup_L        | 1       |
| Heschl_R            | 15      | Frontal_Inf_Oper_L   | 2       |
| Temporal_Sup_R      | 36      | Frontal_Inf_Tri_L    | 9       |
| Temporal_Pole_Sup_R | 18      | Frontal_Mid_L        | 2       |
| Temporal_Mid_R      | 13      | Frontal_Inf_Orb_L    | 1       |
| Temporal_Pole_Mid_R | 3       | Calcarine_L          | 15      |
| Temporal_Inf_R      | 3       | Cingulum_Ant_L       | 6       |
| Rolandic_Oper_L     | 8       | Cingulum_Mid_L       | 98      |
| Insula_L            | 1       | Cingulum_Post_L      | 1       |
| Cingulum_Ant_L      | 1       | Cuneus_L             | 24      |
| Cingulum_Mid_L      | 21      | Rolandic_Oper_L      | 4       |
| Hippocampus_L       | 4       | Supp_Motor_Area_L    | 7       |
| ParaHippocampal_L   | 10      | Insula_L             | 16      |
| Calcarine_L         | 13      | ParaHippocampal_L    | 7       |
| Cuneus_L            | 26      | Lingual_L            | 48      |
| Lingual_L           | 16      | Occipital_Sup_L      | 24      |
| Occipital_Sup_L     | 23      | Occipital_Mid_L      | 10      |
| Occipital_Mid_L     | 3       | Occipital_Inf_L      | 7       |
| Fusiform_L          | 26      | Fusiform_L           | 43      |
| SupraMarginal_L     | 1       | Postcentral_L        | 13      |
| Angular_L           | 2       | Parietal_Sup_L       | 1       |
| Heschl_L            | 6       | SupraMarginal_L      | 28      |
| Temporal_Sup_L      | 7       | Precuneus_L          | 1       |
| Temporal_Mid_L      | 36      | Paracentral_Lobule_L | 18      |
| Temporal_Inf_L      | 24      | Temporal_Inf_L       | 6       |
|                     |         | Temporal_Pole_Mid_L  | 7       |
|                     |         | Temporal_Pole_Sup_L  | 19      |

L: left, R: right.

**Table S4.** Numbers of active voxels in AAL90 areas by cortical activity when comparing DIVA\_EEG model and real EEG.

| Perturbed-Undisturbed |         |                     |         |
|-----------------------|---------|---------------------|---------|
| Area                  | # voxel | Area                | # voxel |
| Precentral_R          | 12      | Precentral_L        | 3       |
| Frontal_Inf_Oper_R    | 7       | Rolandic_Oper_L     | 6       |
| Rolandic_Oper_R       | 21      | Insula_L            | 10      |
| Insula_R              | 20      | Cingulum_Mid_L      | 13      |
| Cingulum_Mid_R        | 1       | Hippocampus_L       | 4       |
| Cingulum_Post_R       | 1       | ParaHippocampal_L   | 4       |
| ParaHippocampal_R     | 1       | Fusiform_L          | 10      |
| Lingual_R             | 3       | Postcentral_L       | 1       |
| Fusiform_R            | 1       | Parietal_Sup_L      | 1       |
| Postcentral_R         | 11      | Heschl_L            | 1       |
| Parietal_Sup_R        | 1       | SupraMarginal_L     | 7       |
| Parietal_Inf_R        | 1       | Temporal_Mid_L      | 2       |
| SupraMarginal_R       | 3       | Temporal_Pole_Mid_L | 4       |
| Paracentral_Lobule_R  | 1       | Temporal_Pole_Sup_L | 8       |
| Heschl_R              | 10      | Temporal_Sup_L      | 5       |
| Temporal_Sup_R        | 15      |                     |         |
| Temporal_Pole_Sup_R   | 10      |                     |         |
| Temporal_Mid_R        | 1       |                     |         |

L: left, R: right.

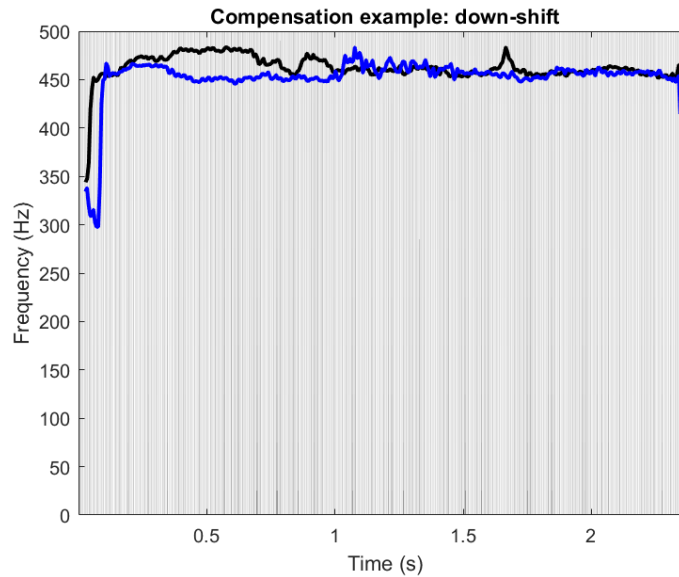

**Figure S2.** Example of compensations in the same direction of the down- shift F1. black line represents undisturbed and blue line represents down-shift.



**Table S5.** Cohen Effect Size of the cortical activations.

| Small = 1.020                                                                     |                                                                                   |                                                                                   | Medium = 2.550                                                                    |                                                                                   |                                                                                    | Large = 4.079                                                                       |                                                                                     |                                                                                     |
|-----------------------------------------------------------------------------------|-----------------------------------------------------------------------------------|-----------------------------------------------------------------------------------|-----------------------------------------------------------------------------------|-----------------------------------------------------------------------------------|------------------------------------------------------------------------------------|-------------------------------------------------------------------------------------|-------------------------------------------------------------------------------------|-------------------------------------------------------------------------------------|
| Down-undisturbed                                                                  | Up-undisturbed                                                                    | Down-up                                                                           | Down-undisturbed                                                                  | Up-undisturbed                                                                    | Down-up                                                                            | Down-undisturbed                                                                    | Up-undisturbed                                                                      | Down-up                                                                             |
|  |  |  |  |  |  |  |  |  |
|  |  |  |  |  |  |  |  |  |
|  |  |  |  |  |  |  |  |  |
|  |  |  |  |  |  |  |  |  |
|  |  |  |  |  |  |  |  |  |
